# Supplementary material
Source: publisher figshare collection journal article supplement (https://asha.figshare.com/ndownloader/files/34147023)
Supplement: Supplementary file 1 [file 34147023]

**Supplemental Material S1.** Articles related to the syntax-based account and memory-based account of SLI sentence comprehension.

---

**Syntax-Based Account**

- Adani, F., Forgiarini, M., Guasti, M., & van der Lely, H. (2011). Number dissimilarities facilitate the comprehension of relative clauses in children with (Grammatical) Specific Language Impairment. *Journal of Child Language*, 41, 811–841.
- Friedmann, N., & Novogrodsky, R. (2007). Is the movement deficit in syntactic SLI related to traces or to thematic role transfer? *Brain and Language*, 101, 50–63.
- Håkansson, G., & Hansson, K. (2000). Comprehension and production of relative clauses: A comparison between Swedish impaired and unimpaired children. *Journal of Child Language*, 27, 313–333.
- Marinis, T., & van der Lely, H. (2007). On-line processing of *wh*-questions in children with G-SLI and typically developing children. *International Journal of Language and Communication Disorders*, 42, 557–582.
- Marshall, C., & van der Lely, H. (2006). A challenge to current models of past tense inflection: The impact of phonotactics. *Cognition*, 100, 302–320.
- Marshall, C., Marinis, T., & van der Lely, H. (2007). Passive verb morphology: The effect of phonotactics on passive comprehension in typically developing and Grammatical-SLI children. *Lingua*, 117, 302–320.
- Stavrakaki, S. (2001). Comprehension of reversible relative clauses in specifically language impaired and normally developing Greek children. *Brain and Language*, 77, 419–431.
- van der Lely, H. (1994). Canonical linking rules: Forward versus reverse linking in normally developing and specifically language impaired children. *Cognition*, 51, 29–72.
- van der Lely, H. (1996). Specifically language impaired and normally developing children: Verbal passive vs. adjectival passive sentence interpretation. *Lingua*, 98, 243–272.
- van der Lely, H. (1998). SLI in children: Movement, economy, and deficits in the computational-syntactic system. *Language Acquisition*, 7, 161–192.
- van der Lely, H. (2005). Domain-specific cognitive systems: Insight from Grammatical-SLI. *Trends in Cognitive Sciences*, 9, 53–59.
- van der Lely, H., & Battell, M. (2003). WH-movement in children with grammatical SLI: A test of the RDDR hypothesis. *Language*, 79, 153–181.
- van der Lely, H., & Dewart, M. (1986). Sentence comprehension strategies in specifically language impaired children. *British Journal of Disorders of Communication*, 21, 291–306.

- van der Lely, H., & Harris, M. (1990). Comprehension of reversible sentences in specifically language impaired children. *Journal of Speech and Hearing Disorders*, 55, 101–117.
- van der Lely, H., Jones, M., & Marshall, C. (2011). Who did Buzz see someone? Grammaticality judgment of *wh*-questions in typically developing children and children with G-SLI. *Lingua*, 121, 408–422.
- van der Lely, H., Rosen, S., & McClelland, A. (1998). Evidence for a grammar-specific deficit in children. *Current Biology* 8, 1253–1258.
- van der Lely, H., Rosen, S., & Adlard, A. (2004). Grammatical language impairment and the specificity of cognitive domains: Relations between auditory and language abilities. *Cognition*, 94, 167–183.
- van der Lely, H., & Stollwerck, L. (1996). A grammatical-specific language impairment in children: An autosomal dominant inheritance? *Brain and Language*, 52, 484–504.
- van der Lely, H., & Stollwerck, L. (1997). Binding theory and grammatical specific language impairment in children. *Cognition*, 62, 245–290.
- 

### **Memory-Based Account**

- Bishop, D., Bright, P., James, C., Bishop, S., & van der Lely, H. (2000). Grammatical SLI: A distinct subtype of developmental language impairment? *Applied Psycholinguistics*, 21, 159–181.
- Deevy, P., & Leonard, L. (2004). The comprehension of *wh*-questions with specific language impairment. *Journal of Speech, Language, and Hearing Research*, 47, 802–815.
- Epstein, B., Hestvik, A., Shafer, V., & Schwartz, R. (2013). ERPs reveal atypical processing of subject versus object *wh*-questions in children with specific language impairment. *International Journal of Language and Communication Disorders*, 48, 351–365.
- Hestvik, A., Schwartz, R., & Tornyoova, L. (2010). Relative clause gap-filling in children with specific language impairment. *Journal of Psycholinguistic Research*, 39, 443–456.
- Kidd, E. (2013). The role verbal working memory in children's sentence comprehension. *Topics in Language Disorders*, 33, 208–223.
- Leclercq, A., Majerus, S., Prigent, G., & Maillart, C. (2013). The impact of dual tasking on sentence comprehension in children with specific language impairment. *Journal of Speech, Language, and Hearing Research*, 56, 265–280.
- Leonard, L., Deevy, P., Fey, M., & Bredin-Oja, S. (2013). Sentence comprehension in specific language impairment: A task designed to distinguish between cognitive capacity and syntactic complexity. *Journal of Speech, Language, and Hearing Research*, 56, 577–589.
- Marton, K., & Schwartz, R. (2003). Working memory capacity and language processes in children with

- specific language impairment. *Journal of Speech, Language, and Hearing Research*, 46, 1138–1153.
- Montgomery, J. (1995). Sentence comprehension in children with specific language impairment: The role of phonological working memory. *Journal of Speech and Hearing Research*, 38, 187–199.
- Montgomery, J. (2000a). Relation of working memory to on-line and off-line sentence processing in children with specific language impairment. *Applied Psycholinguistics*, 21, 117–148.
- Montgomery, J. (2000b). Verbal working memory and sentence comprehension in children with specific language impairment. *Journal of Speech, Language, and Hearing Research*, 43, 293–308.
- Montgomery, J. (2008). Role of auditory attention in the real-time processing of simple grammar by children with specific language impairment: A preliminary study. *International Journal of Language and Communication Disorders*, 43, 499–527.
- Montgomery, J., & Evans, J. (2009). Complex sentence comprehension and working memory in children with specific language impairment. *Journal of Speech, Language, and Hearing Research*, 52, 269–288.
- Montgomery, J., Evans, J., & Gillam, R. (2009). Relation of auditory attention and complex sentence comprehension in children with specific language impairment: A preliminary study. *Applied Psycholinguistics*, 30, 123–151.
- Norbury, C., Bishop, D., & Briscoe, J. (2002). Does impaired grammatical comprehension provide evidence of an innate grammar module? *Applied Psycholinguistics*, 23, 247–268.
- Robertson, E., & Joanisse, M. (2010). Spoken sentence comprehension in children with dyslexia and language impairment: Roles of syntax and working memory. *Applied Psycholinguistics*, 31, 141–165.
- 
-
